# Supplementary material for: Quantifying variability, source, and transport of CO in the urban areas over the Himalayas and Tibetan Plateau
Source: Copernicus journal article supplement (doi:10.5194/acp-21-9201-2021), 2021-06-16
Supplement: Supplementary file 1 [file acp-21-9201-2021-supplement.pdf]

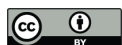

*Supplement of*

## **Quantifying variability, source, and transport of CO in the urban areas over the Himalayas and Tibetan Plateau**

**Youwen Sun et al.**

*Correspondence to:* Yuan Cheng (ycheng@hit.edu.cn), Qianggong Zhang (qianggong.zhang@itpcas.ac.cn) and Bo Zheng (bozheng@sz.tsinghua.edu.cn)

The copyright of individual parts of the supplement might differ from the article licence.

1  
2

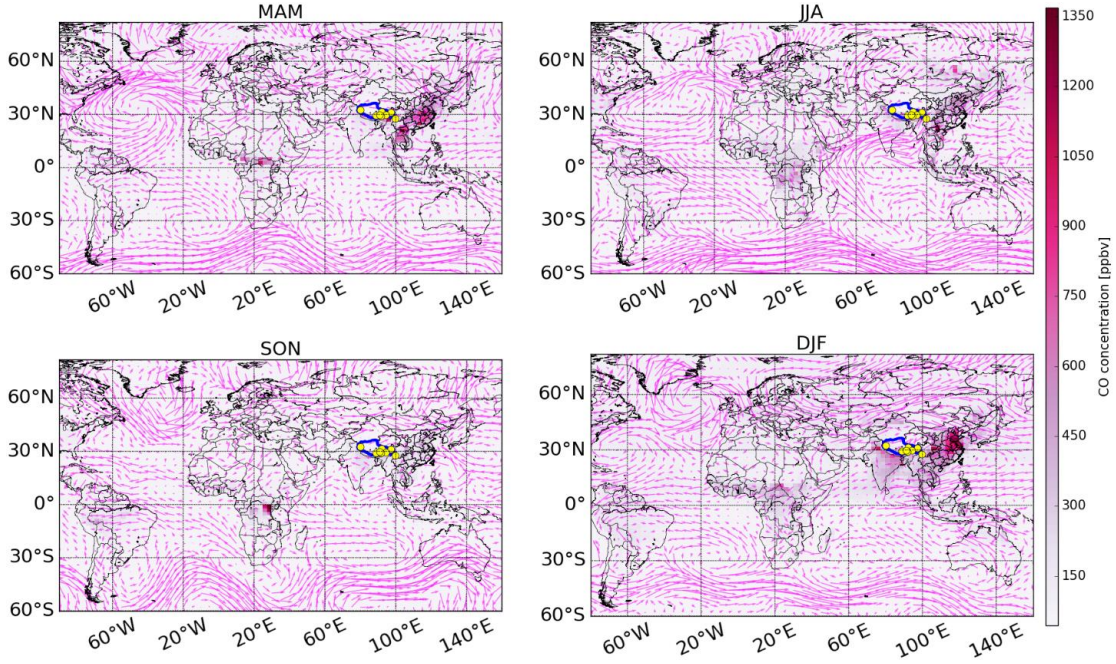

(a)

3  
4

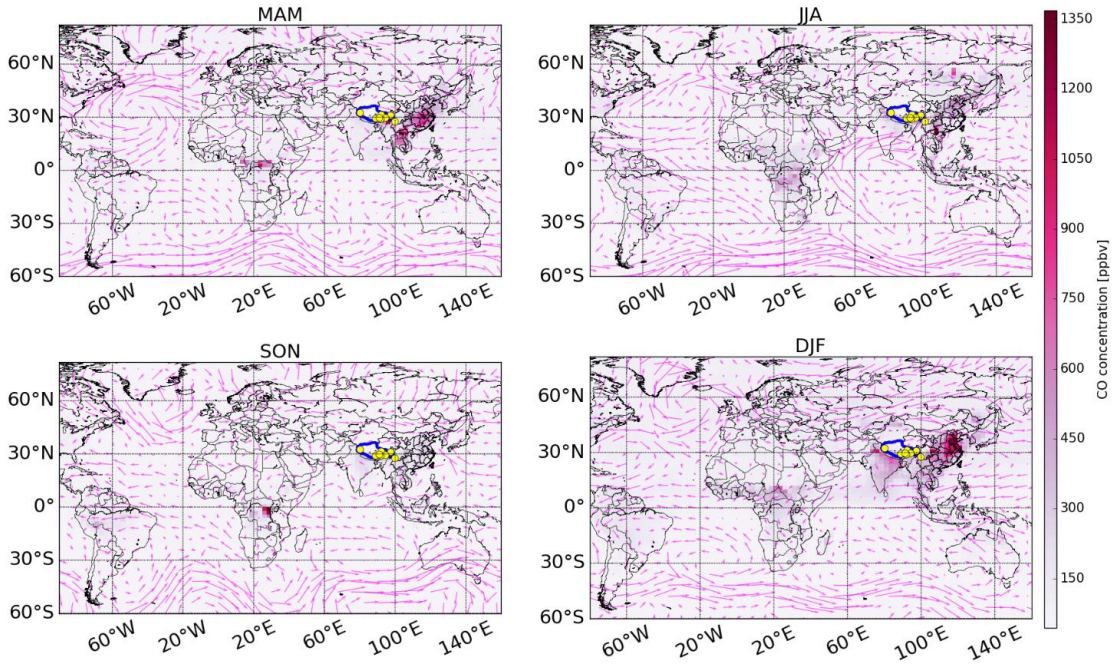

(b)

5 **Fig. S1.** Comparison between GDAS-1 meteorological fields ( $1^\circ$ latitude  $\times$   $1^\circ$ longitude) used for back trajectories  
6 calculation and Goddard Earth Observing System-Forward Processing (GEOS-FP) meteorological fields ( $2^\circ$ latitude  
7  $\times$   $2.5^\circ$ longitude) used for GEOS-Chem simulation. The arrows represent the mean horizontal wind vectors at 500  
8 hPa. Spatial distributions of CO VMR in the GEOS-Chem tagged CO simulations in different seasons are also shown.  
9 The HTP and the studied regions are marked with a blue outline and yellow dots, respectively. (a) and (b) are  
10 meteorological fields from the GDAS-1 and GEOS-PF dataset, respectively.

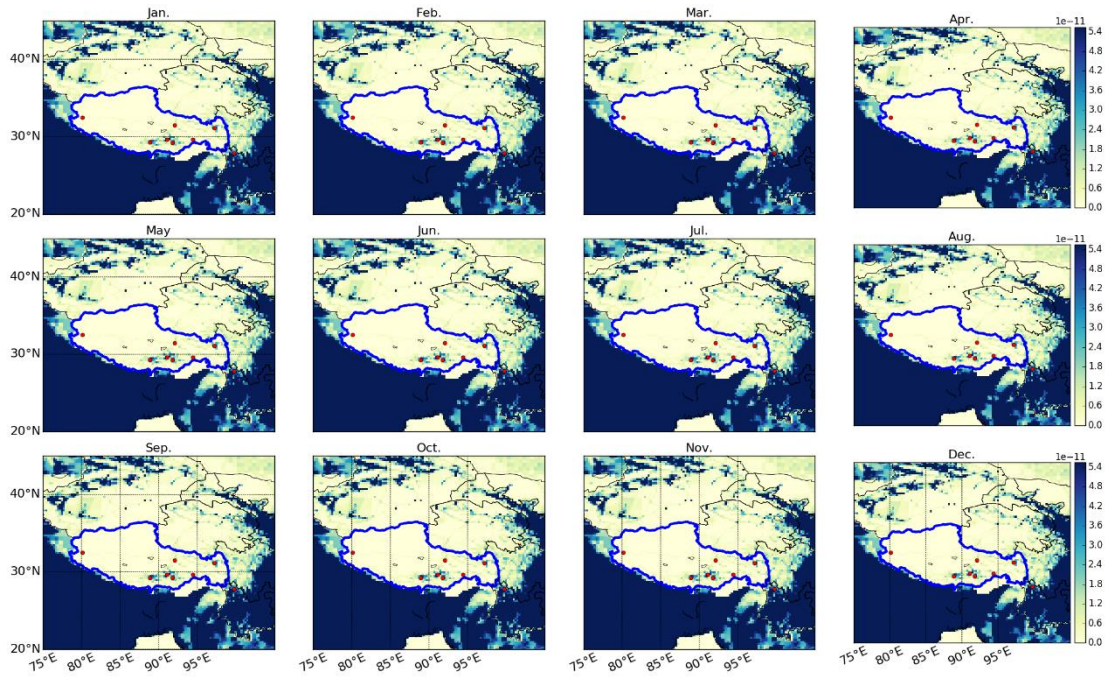

1  
2  
3  
4  
5

Fig. S2. Total CO emission distribution in 2017 ( $0.25^\circ \times 0.25^\circ$ ) from the Multi-resolution Emission Inventory for China (MEIC) over the Himalayas and Tibetan Plateau (HTP) region and surroundings. Units are in  $\text{kg}/\text{m}^2/\text{s}$ . The HTP and the studied regions are marked with a blue outline and red dots, respectively.
